# Supplementary material for: Association of clinical and genetic risk factors with management of dyslipidaemia: analysis of repeated cross-sectional studies in the general population of Lausanne, Switzerland
Source: HighWire-hosted journal article supplement (doi:10.1136/bmjopen-2022-065409), 2023-02-01
Supplement: bmjopen-2022-065409supp005_data_supplement.pdf [file bmjopen-2022-065409supp005_data_supplement.pdf]

**Supplemental figure 4:** comparison of statin potency considering or not posology, first (2009-2012) and second (2014-2017) follow-ups of the CoLaus|PsyCoLaus study, Lausanne, Switzerland.

### First follow-up

|                         |              | <i>With posology</i> |              |      |
|-------------------------|--------------|----------------------|--------------|------|
|                         |              | Low                  | Intermediate | High |
| <i>Without posology</i> | Low          | 85                   | 87           | 0    |
|                         | Intermediate | 283                  | 7            | 0    |
|                         | High         | 0                    | 256          | 70   |

### Second follow-up

|                         |              | <i>With posology</i> |              |      |
|-------------------------|--------------|----------------------|--------------|------|
|                         |              | Low                  | Intermediate | High |
| <i>Without posology</i> | Low          | 67                   | 43           | 0    |
|                         | Intermediate | 197                  | 8            | 0    |
|                         | High         | 0                    | 282          | 136  |
